# Supplementary material for: Nonrandom divergence of gene expression following gene and genome duplications in the flowering plant Arabidopsis thaliana
Source: Springer Nature journal article supplement (doi:10.1186/gb-2006-7-2-r13), 2006-02-20
Supplement: 13059_2005_1281_MOESM1_ESM.pdf [file 13059_2005_1281_MOESM1_ESM.pdf]

---

# Dataset 1

| Series                | Slide Name           | Slide type          | Corresponds to |  |
|-----------------------|----------------------|---------------------|----------------|--|
| 1                     | A1.MILL.AIR.CEL      | c1                  |                |  |
|                       | A1.MILL.AIR.REP2.CEL | c1                  |                |  |
|                       | A2.MILL.ETH.CEL      | e1                  | c1             |  |
|                       | A2.MILL.ETH.REP2.CEL | e1                  | c1             |  |
|                       | A3.MILL.LL.CEL       | e2                  | c1             |  |
|                       | A3.MILL.LL.REP2.CEL  | e2                  | c1             |  |
|                       | A4.MILL.AIR.REP3.CEL | c1                  |                |  |
|                       | A5.MILL.ETH.REP3.CEL | e1                  | c1             |  |
|                       | A6.MILL.LL.REP3.CEL  | e2                  | c1             |  |
| 2                     | A10.Warre.Wca.CEL    | e1                  | c1             |  |
|                       | A11.Warre.6ca.CEL    | e6                  | c1             |  |
|                       | A12.Warre.6ca.CEL    | e6                  | c1             |  |
|                       | A13.Warre.3ca.CEL    | e9                  | c1             |  |
|                       | A14.Warre.3ca.CEL    | e9                  | c1             |  |
|                       | A15.Warre.2ca.CEL    | e4                  | c1             |  |
|                       | A16.Warre.2ca.CEL    | e4                  | c1             |  |
|                       | A17.Warre.Wdr.CEL    | e2                  | c1             |  |
|                       | A18.Warre.Wdr.CEL    | e2                  | c1             |  |
|                       | A19.Warre.6dr.CEL    | e7                  | c1             |  |
|                       | A1.Warre.Wna.CEL     | c1                  |                |  |
|                       | A20.Warre.6dr.CEL    | e7                  | c1             |  |
|                       | A2.Warre.Wna.CEL     | c1                  |                |  |
|                       | A3.Warre.6na.CEL     | e5                  | c1             |  |
|                       | A4.Warre.6na.CEL     | e5                  | c1             |  |
|                       | A5.Warre.3na.CEL     | e8                  | c1             |  |
|                       | A6.Warre.3na.CEL     | e8                  | c1             |  |
|                       | A7.Warre.2na.CEL     | e3                  | c1             |  |
|                       | A8.Warre.2na.CEL     | e3                  | c1             |  |
|                       | A9.Warre.Wca.CEL     | e1                  | c1             |  |
| 3                     | A1.Wilson.mla.CEL    | e1                  | c1             |  |
|                       | A2.Wilson.mlb.CEL    | e2                  | c2             |  |
|                       | A3.Wilson.lea.CEL    | c1                  |                |  |
|                       | A4.Wilson.Ler.CEL    | c2                  |                |  |
|                       | A1.GVB.Rep1.CEL      | e1                  | c1             |  |
|                       | A1.Wilson.Rep2.CEL   | e1                  | c1             |  |
|                       | A2.GVB.Rep1.CEL      | e2                  | c2             |  |
|                       | A2.Wilson.Rep2.CEL   | e2                  | c2             |  |
|                       | A3.GVB.Rep1.CEL      | c1                  |                |  |
|                       | A3.Wilson.Rep2.CEL   | c1                  |                |  |
|                       | A4.GVB.Rep1.CEL      | c2                  |                |  |
|                       | A4.Wilson.Rep2.CEL   | c2                  |                |  |
|                       | 4                    | A1.WARRE.WTC.2..CEL | c1             |  |
|                       |                      | A2.WARRE.WTW.CEL    | c1             |  |
| A3.WARRE.S6C.CEL      |                      | e1                  | c1             |  |
| A4.WARRE.S6W.2..CEL   |                      | e1                  | c1             |  |
| A5.WARRE.S2C.new..CEL |                      | e2                  | c1             |  |
| A6.WARRE.S2W.CEL      |                      | e2                  | c1             |  |

---

|    |                     |    |    |
|----|---------------------|----|----|
| 5  | Control.3.new.CEL   | c2 |    |
|    | Control.4..CEL      | c2 |    |
|    | Heat.3.new.CEL      | e3 | c2 |
|    | Heat.4..CEL         | e3 | c2 |
|    | Sen.3.new.CEL       | e4 | c2 |
|    | Sen.4..CEL          | e4 | c2 |
| 6  | A1.1.cornah.icl.CEL | e1 | c1 |
|    | A1.2.cornah.icl.CEL | e1 | c1 |
|    | A1.3.cornah.icl.CEL | e1 | c1 |
|    | A2.1.cornah.irv.CEL | e2 | c1 |
|    | A2.2.cornah.irv.CEL | e2 | c1 |
|    | A2.3.cornah.irv.CEL | e2 | c1 |
|    | A3.1.cornah.msx.CEL | e3 | c1 |
|    | A3.2.cornah.msx.CEL | e3 | c1 |
|    | A3.3.cornah.msx.CEL | e3 | c1 |
|    | A4.1.cornah.wsx.CEL | c1 |    |
|    | A4.2.cornah.wsx.CEL | c1 |    |
|    | A4.3.cornah.wsx.CEL | c1 |    |
| 7  | A1.LLOYD.POH.CEL    | e1 | c1 |
|    | A2.LLOYD.POH.CEL    | e1 | c1 |
|    | A3.LLOYD.POH.CEL    | e1 | c1 |
|    | A4.LLOYD.CON.CEL    | c1 |    |
|    | A5.LLOYD.CON.CEL    | c1 |    |
|    | A6.LLOYD.CON.CEL    | c1 |    |
| 8  | A10.grevi.AT1.CEL   | e3 | c1 |
|    | A11.grevi.AT2.CEL   | e3 | c1 |
|    | A12.grevi.AT3.CEL   | e3 | c1 |
|    | A1.grevi.CC1.CEL    | c1 |    |
|    | A2.grevi.CC2.CEL    | c1 |    |
|    | A3.grevi.CC3.CEL    | c1 |    |
|    | A4.grevi.AC1.CEL    | e1 | c1 |
|    | A5.grevi.AC2.CEL    | e1 | c1 |
|    | A6.grevi.AC3.CEL    | e1 | c1 |
|    | A7.grevi.CT1.CEL    | e2 | c1 |
|    | A8.grevi.CT2.CEL    | e2 | c1 |
|    | A9.grevi.CT3.CEL    | e2 | c1 |
| 9  | A1.Heggi.CAG.CEL    | c1 |    |
|    | A2.Heggi.CEG.CEL    | e3 | c1 |
|    | A3.Heggi.HAG.CEL    | e2 | c1 |
|    | A4.Heggi.HEG.CEL    | e1 | c1 |
|    | A5.Heggi.CAW.CEL    | c1 |    |
|    | A6.Heggi.CEW.CEL    | e3 | c1 |
|    | A7.Heggi.HAW.CEL    | e2 | c1 |
|    | A8.Heggi.HEW.CEL    | e1 | c1 |
| 10 | A1.jones.WT1.CEL    | c1 |    |
|    | A2.jones.WT2.CEL    | c1 |    |
|    | A3.jones.rh1.CEL    | e1 | c1 |
|    | A4.jones.rh2.CEL    | e1 | c1 |

---

---

|    |                            |     |     |
|----|----------------------------|-----|-----|
| 11 | A1.deeke.tum.CEL           | e1  | c1  |
|    | A2.deeke.Inf.CEL           | c1  |     |
|    | A3.deeke.tum.CEL           | e1  | c1  |
|    | A4.deeke.Inf.CEL           | c1  |     |
| 12 | A1.MUT.Top1.CEL            | e1  | c1  |
|    | A2.MUT.Top2.CEL            | e1  | c1  |
|    | A3.MUT.Base1.CEL           | e2  | c2  |
|    | A4.MUT.Base2.CEL           | e2  | c2  |
|    | A5.Turner.WT.Top1.CEL      | c1  |     |
|    | A6.WT.Top2.CEL             | c1  |     |
|    | A7.WT.Base1.CEL            | c2  |     |
|    | A8.WT.Base2.CEL            | c2  |     |
| 13 | A1.Fille.WT.nodex.CEL      | c1  |     |
|    | A2.Fille.WT..dex.CEL       | e1  | c1  |
|    | A3.Fille.ANGR4.12.CEL      | e2  | c1  |
|    | A4.Fille.ANGR4.12.dex.CEL  | e3  | c1  |
|    | A5.Fille.WTnodex.CEL       | c1  |     |
|    | A6.Fille.WT.dex.CEL        | e1  | c1  |
|    | A7.Fille.ANGR4.12nodex.CEL | e2  | c1  |
|    | A8.Fille.ANGR4.12.dex.CEL  | e3  | c1  |
| 14 | A10.Smith.17.CEL           | c10 | c9  |
|    | A11.Smith.21B.CEL          | c1  | c10 |
|    | A1.Smith.21A.CEL           | c1  | c10 |
|    | A2.Smith.22.CEL            | c2  | c1  |
|    | A3.Smith.23.CEL            | c3  | c2  |
|    | A4.Smith.1.CEL             | c4  | c3  |
|    | A5.Smith.5.CEL             | c5  | c4  |
|    | A6.Smith.8.45.CEL          | c6  | c5  |
|    | A7.Smith.10.CEL            | c7  | c6  |
|    | A8.Smith.11.CEL            | c8  | c7  |
|    | A9.Smith.13.CEL            | c9  | c8  |
|    | A10.smith.20h.CEL          | c10 | c9  |
|    | A11.smith.24h.CEL          | c1  | c10 |
|    | A1.smith.00h.CEL           | c1  | c10 |
|    | A2.smith.01h.CEL           | c2  | c1  |
|    | A3.smith.02h.CEL           | c3  | c2  |
|    | A4.smith.04h.CEL           | c4  | c3  |
|    | A5.smith.08h.CEL           | c5  | c4  |
|    | A6.smith.12h.CEL           | c6  | c5  |
|    | A7.smith.13h.CEL           | c7  | c6  |
|    | A8.smith.14h.CEL           | c8  | c7  |
|    | A9.smith.16h.CEL           | c9  | c8  |
| 15 | A10.Bwooll.Col2.CEL        | e4  | c1  |
|    | A1.Bwooll.COG.CEL          | c1  |     |
|    | A2.Bwooll.C5G.CEL          | e1  | c1  |
|    | A3.Bwooll.COS.CEL          | c1  |     |
|    | A4.Bwooll.CSS.CEL          | e1  | c1  |

---

---

|                        |    |    |
|------------------------|----|----|
| A5.Bwoll.NG1.CEL       | e2 | c1 |
| A6.Bwoll.NG2.CEL       | e2 | c1 |
| A7.Bwoll.E11.CEL       | e3 | c1 |
| A8.Bwoll.E12.CEL       | e3 | c1 |
| A9.Bwoll.Col1.CEL      | e4 | c1 |
| 16 A1.WILLA.CON.CEL    | c1 |    |
| A2.WILLA.ISOX.CEL      | e1 | c1 |
| A1.willa.CON.REP2.CEL  | c1 |    |
| A1.willa.CON.REP3.CEL  | c1 |    |
| A2.willa.ISOX.REP2.CEL | e1 | c1 |
| A2.willa.ISOX.REP3.CEL | e1 | c1 |

---

Table: The first set of 153 microarrays that were used for this study are publicly available from the Nottingham Arabidopsis Stock Centre [60,61]. These belonged to 16 different series of experiments, that all included one or several experimental condition(s) (depicted as 'e') and at least one wildtype (controle, depicted as 'c').
