# Supplementary material for: Nonrandom divergence of gene expression following gene and genome duplications in the flowering plant Arabidopsis thaliana
Source: Springer Nature journal article supplement (doi:10.1186/gb-2006-7-2-r13), 2006-02-20
Supplement: 13059_2005_1281_MOESM2_ESM.pdf [file 13059_2005_1281_MOESM2_ESM.pdf]

---

## Dataset 2

---

| Experiment | Tissue                                                                                | Age      | Photoperiod      | Substrate |
|------------|---------------------------------------------------------------------------------------|----------|------------------|-----------|
| ATGE_1     | cotyledons                                                                            | 7 days   | continuous light | soil      |
| ATGE_2     | hypocotyl                                                                             | 7 days   | continuous light | soil      |
| ATGE_3     | roots                                                                                 | 7 days   | continuous light | soil      |
| ATGE_4     | shoot apex, vegetative + young leaves                                                 | 7 days   | continuous light | soil      |
| ATGE_5     | leaves 1 + 2                                                                          | 7 days   | continuous light | soil      |
| ATGE_6     | shoot apex, vegetative                                                                | 7 days   | continuous light | soil      |
| ATGE_7     | seedling, green parts                                                                 | 7 days   | continuous light | soil      |
| ATGE_8     | shoot apex, transition (before bolting)                                               | 14 days  | continuous light | soil      |
| ATGE_9     | roots                                                                                 | 17 days  | continuous light | soil      |
| ATGE_10    | rosette leaf #4, 1 cm long                                                            | 10 days  | continuous light | soil      |
| ATGE_12    | rosette leaf # 2                                                                      | 17 days  | continuous light | soil      |
| ATGE_13    | rosette leaf # 4                                                                      | 17 days  | continuous light | soil      |
| ATGE_14    | rosette leaf # 6                                                                      | 17 days  | continuous light | soil      |
| ATGE_15    | rosette leaf # 8                                                                      | 17 days  | continuous light | soil      |
| ATGE_16    | rosette leaf # 10                                                                     | 17 days  | continuous light | soil      |
| ATGE_17    | rosette leaf # 12                                                                     | 17 days  | continuous light | soil      |
| ATGE_19    | leaf 7, petiole                                                                       | 17 days  | continuous light | soil      |
| ATGE_20    | leaf 7, proximal half                                                                 | 17 days  | continuous light | soil      |
| ATGE_21    | leaf 7, distal half                                                                   | 17 days  | continuous light | soil      |
| ATGE_22    | developmental drift, entire rosette after transition to flowering, but before bolting | 21 days  | continuous light | soil      |
| ATGE_23    | as above                                                                              | 22 days  | continuous light | soil      |
| ATGE_24    | as above                                                                              | 23 days  | continuous light | soil      |
| ATGE_25    | senescing leaves                                                                      | 35 days  | continuous light | soil      |
| ATGE_26    | cauline leaves                                                                        | 21+ days | continuous light | soil      |

---

---

|         |                                                                                   |          |                   |      |
|---------|-----------------------------------------------------------------------------------|----------|-------------------|------|
| ATGE_27 | stem, 2nd internode                                                               | 21+ days | continuous light  | soil |
| ATGE_28 | 1st node                                                                          | 21+ days | continuous light  | soil |
| ATGE_29 | shoot apex, inflorescence (after bolting)                                         | 21 days  | continuous light  | soil |
| ATGE_31 | flowers stage 9                                                                   | 21+ days | continuous light  | soil |
| ATGE_32 | flowers stage 10/11                                                               | 21+ days | continuous light  | soil |
| ATGE_33 | flowers stage 12                                                                  | 21+ days | continuous light  | soil |
| ATGE_34 | flowers stage 12, sepals                                                          | 21+ days | continuous light  | soil |
| ATGE_35 | flowers stage 12, petals                                                          | 21+ days | continuous light  | soil |
| ATGE_36 | flowers stage 12, stamens                                                         | 21+ days | continuous light  | soil |
| ATGE_37 | flowers stage 12, carpels                                                         | 21+ days | continuous light  | soil |
| ATGE_39 | flowers stage 15                                                                  | 21+ days | continuous light  | soil |
| ATGE_40 | flowers stage 15, pedicels                                                        | 21+ days | continuous light  | soil |
| ATGE_41 | flowers stage 15, sepals                                                          | 21+ days | continuous light  | soil |
| ATGE_42 | flowers stage 15, petals                                                          | 21+ days | continuous light  | soil |
| ATGE_43 | flowers stage 15, stamen                                                          | 21+ days | continuous light  | soil |
| ATGE_45 | flowers stage 15, carpels                                                         | 21+ days | continuous light  | soil |
| ATGE_73 | mature pollen                                                                     | 6 wk     | continuous light  | soil |
| ATGE_76 | siliques, w/ seeds stage 3; mid globular to early heart embryos                   | 8 wk     | long day (16/8)   | soil |
| ATGE_77 | siliques, w/ seeds stage 4; early to late heart embryos                           | 8 wk     | long day (16/8)   | soil |
| ATGE_78 | siliques, w/ seeds stage 5; late heart to mid torpedo embryos                     | 8 wk     | long day (16/8)   | soil |
| ATGE_79 | seeds, stage 6, w/o siliques; mid to late torpedo embryos                         | 8 wk     | long day (16/8)   | soil |
| ATGE_81 | seeds, stage 7, w/o siliques; late torpedo to early walking-stick embryos         | 8 wk     | long day (16/8)   | soil |
| ATGE_82 | seeds, stage 8, w/o siliques; walking-stick to early curled cotyledons embryos    | 8 wk     | long day (16/8)   | soil |
| ATGE_83 | seeds, stage 9, w/o siliques; curled cotyledons to early green cotyledons embryos | 8 wk     | long day (16/8)   | soil |
| ATGE_84 | seeds, stage 10, w/o siliques; green cotyledons embryos                           | 8 wk     | long day (16/8)   | soil |
| ATGE_87 | vegetative rosette                                                                | 7 days   | short day (10/14) | soil |
| ATGE_89 | vegetative rosette                                                                | 14 days  | short day (10/14) | soil |
| ATGE_90 | vegetative rosette                                                                | 21 days  | short day (10/14) | soil |

---

---

|          |                       |         |                  |                        |
|----------|-----------------------|---------|------------------|------------------------|
| ATGE_91  | leaf                  | 15 days | long day (16/8)  | 1x MS agar, 1% sucrose |
| ATGE_92  | flower                | 28 days | long day (16/8)  | soil                   |
| ATGE_93  | root                  | 15 days | long day (16/8)  | 1x MS agar, 1% sucrose |
| ATGE_94  | root                  | 8 days  | continuous light | 1x MS agar             |
| ATGE_95  | root                  | 8 days  | continuous light | 1x MS agar, 1% sucrose |
| ATGE_96  | seedling, green parts | 8 days  | continuous light | 1x MS agar             |
| ATGE_97  | seedling, green parts | 8 days  | continuous light | 1x MS agar, 1% sucrose |
| ATGE_98  | root                  | 21 days | continuous light | 1x MS agar             |
| ATGE_99  | root                  | 21 days | continuous light | 1x MS agar, 1% sucrose |
| ATGE_100 | seedling, green parts | 21 days | continuous light | 1x MS agar             |
| ATGE_101 | seedling, green parts | 21 days | continuous light | 1x MS agar, 1% sucrose |

---

Table: The second set of microarrays that were used for this study contained data that were generated within the framework of the AtgenExpress project [39] and are publicly available from the Nottingham Arabidopsis Stock Centre [60,61]. The RNA was sampled from 63 different plant tissues in different stages.
